# Supplementary material for: PLA-based thermogel for the sustained delivery of chemotherapeutics in a mouse model of hepatocellular carcinoma
Source: Royal Society of Chemistry journal article supplement (doi:10.1039/c6ra08022g), 2016-01-01
Supplement: c6ra08022g1.pdf [file c6ra08022g1.pdf]

## Supporting Information

### PLA-Based Thermogel For The Sustained Delivery Of Chemotherapeutics In A Mouse Model Of Hepatocellular Carcinoma

Yun-Long Wu,<sup>\*d</sup> Han Wang<sup>d</sup>, Ying-Kun Qiu<sup>d</sup>, and Xian Jun Loh<sup>\*abc</sup>

<sup>a</sup> Institute of Materials Research and Engineering, A\*STAR (Agency for Science, Technology and Research); 2 Fusionopolis Way, Innovis, #08-03, Singapore 138634, Singapore.

<sup>b</sup> Department of Materials Science and Engineering, National University of Singapore, 9 Engineering Drive 1, Singapore 117576, Singapore

<sup>c</sup> Singapore Eye Research Institute, 11 Third Hospital Avenue, Singapore 168751, Singapore

<sup>d</sup> School of Pharmaceutical Sciences, Xiamen University, Xiamen, P. R. China

† E-mail: [lohxj@imre.a-star.edu.sg](mailto:lohxj@imre.a-star.edu.sg), [wuy1@xmu.edu.cn](mailto:wuy1@xmu.edu.cn)

**Keywords:** poly(lactic acid), paclitaxel, thermogelling, drug delivery

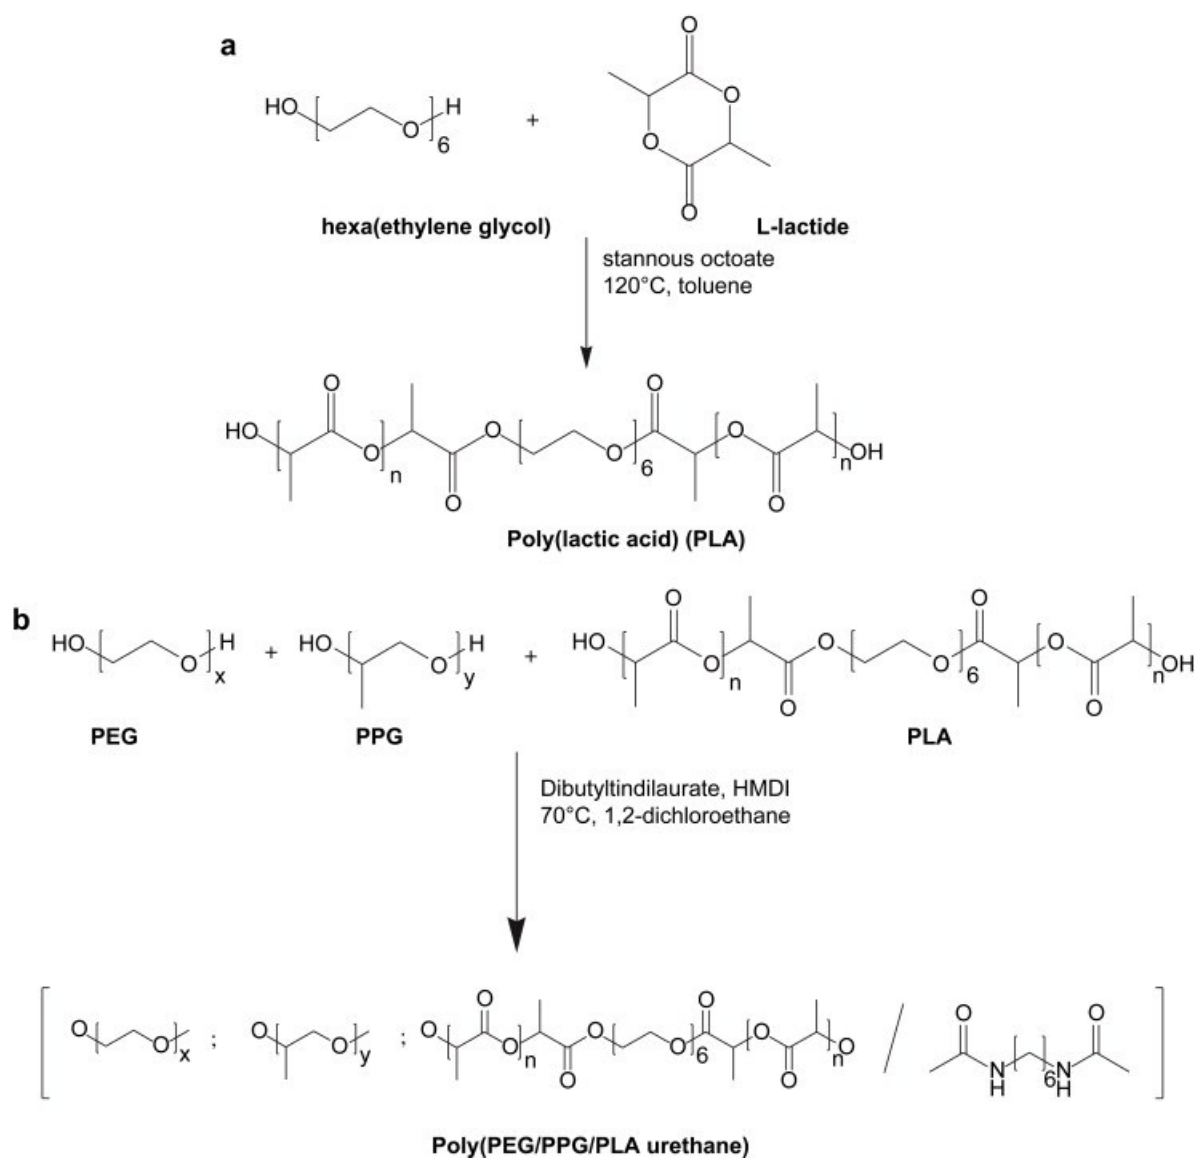

Scheme S1. Synthesis of PLA-diol and poly(PEG/PPG/PLA urethane)s.

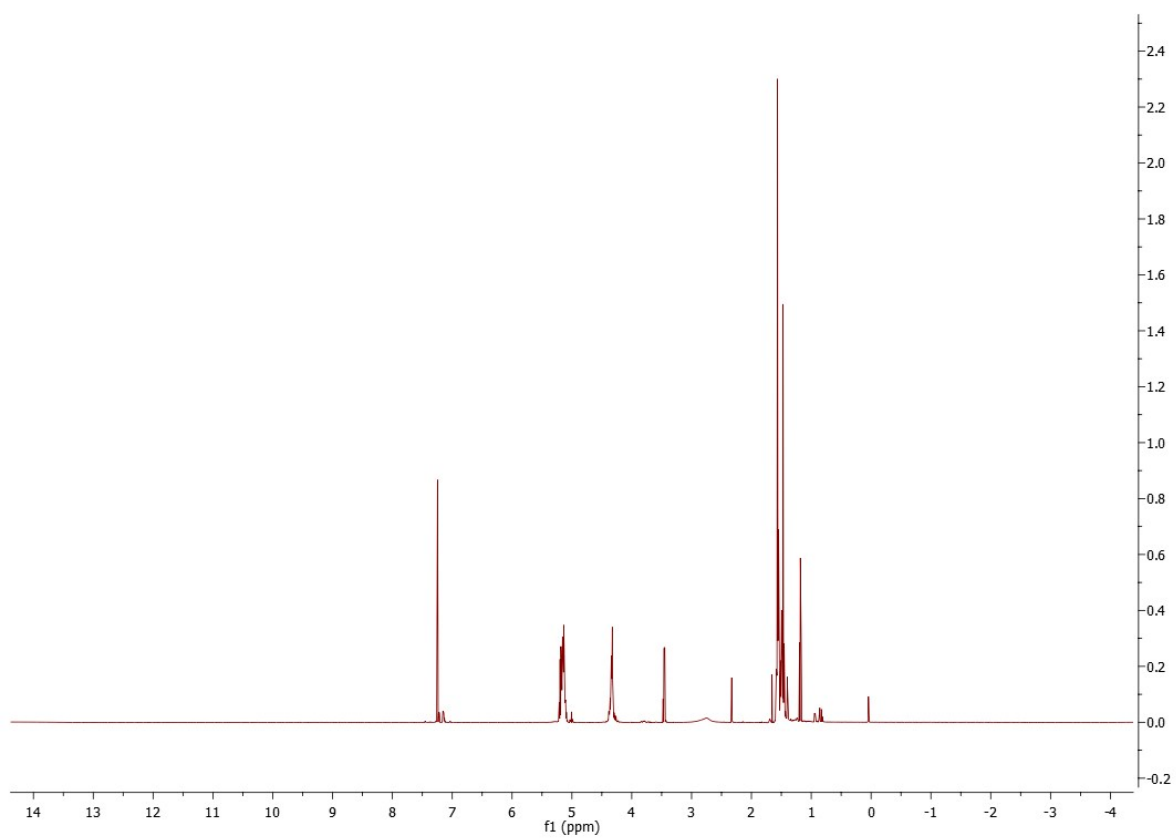

Fig. S1. A 400 MHz  $^1\text{H}$  NMR of PLA in  $\text{CDCl}_3$ .

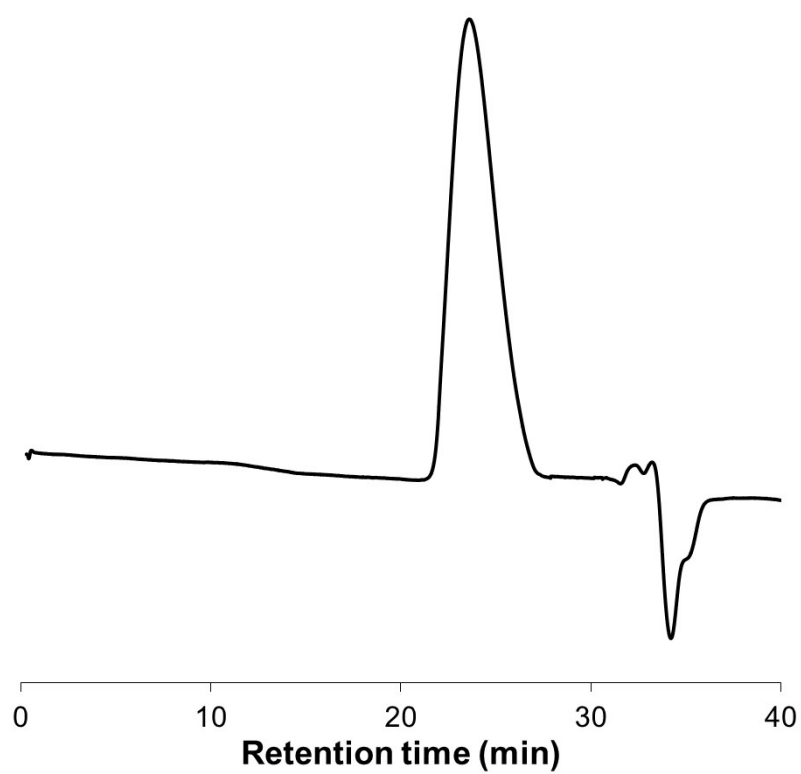

Fig. S2. GPC diagrams of PLA-diol ( $M_n$ : 1,000 g/mol)

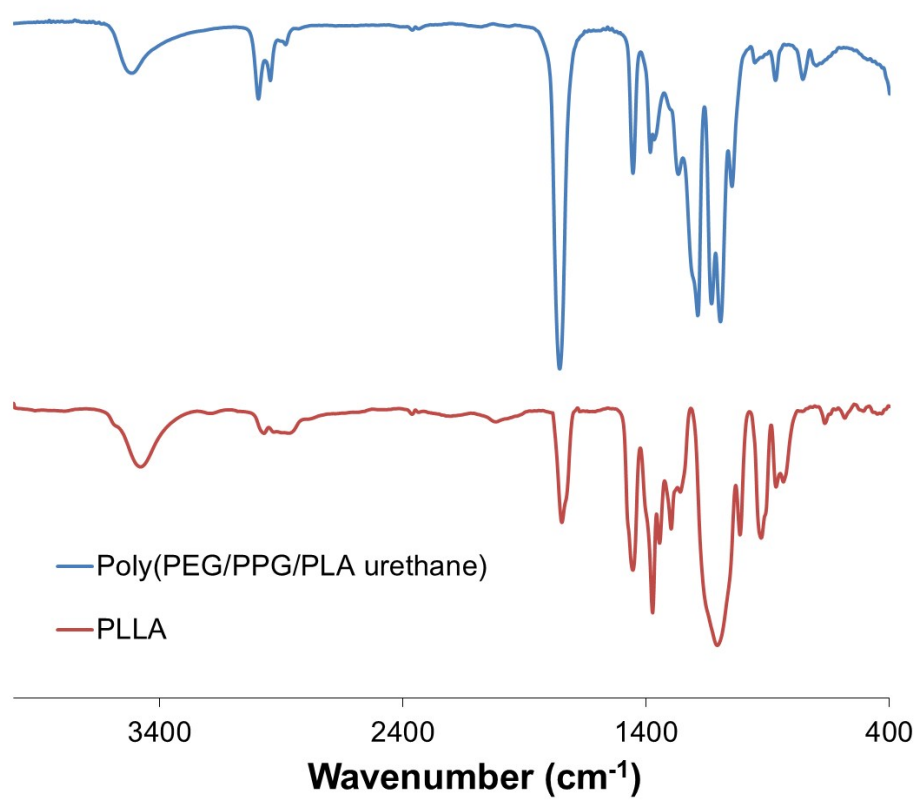

Fig. S3. FTIR spectra of Poly(PEG/PPG/PLLA urethane) and PLLA-diol

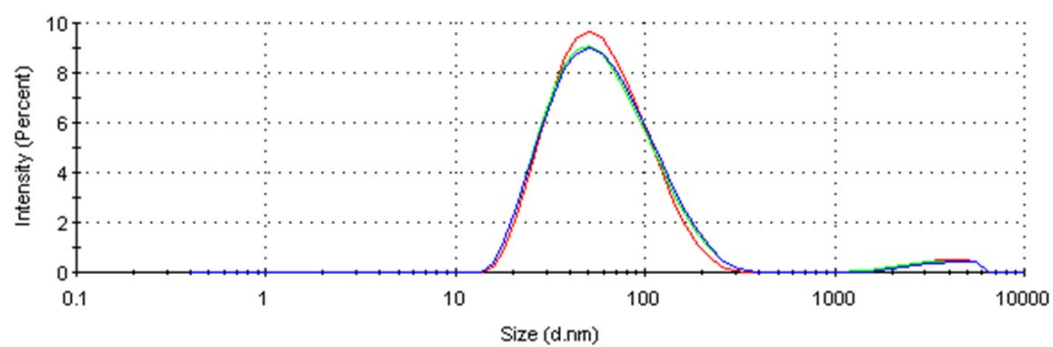

Fig S4. Particle size distribution of poly(PEG/PPG/PLA urethane)s
